# Supplementary material
Source: Springer Nature journal article supplement (https://www.springermedizin.de/resource/supplementary/12881_2009_637_MOESM2_ESM.pdf/9451114)
Supplement: MOESM2 [file 9451114]

a

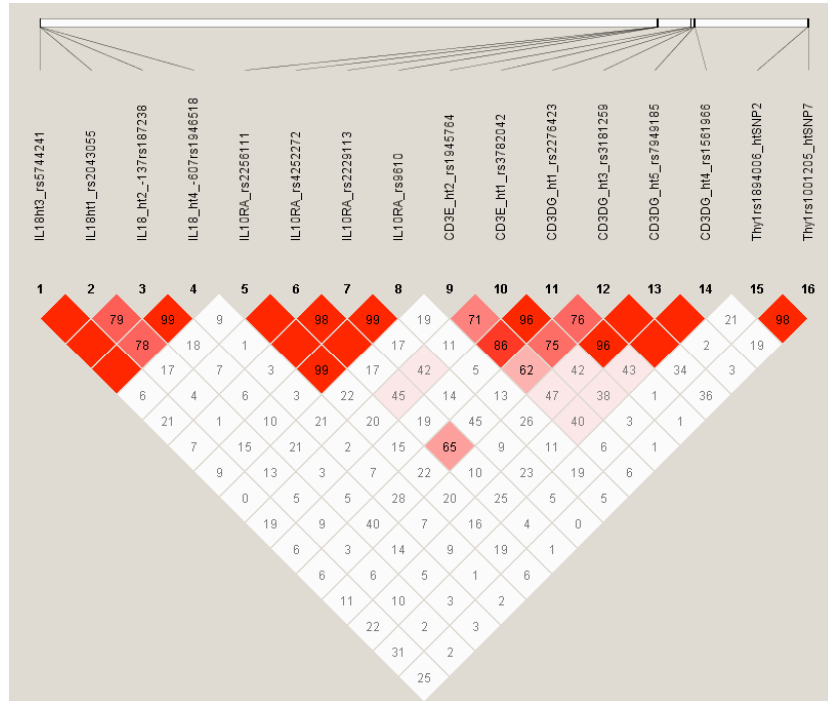

b

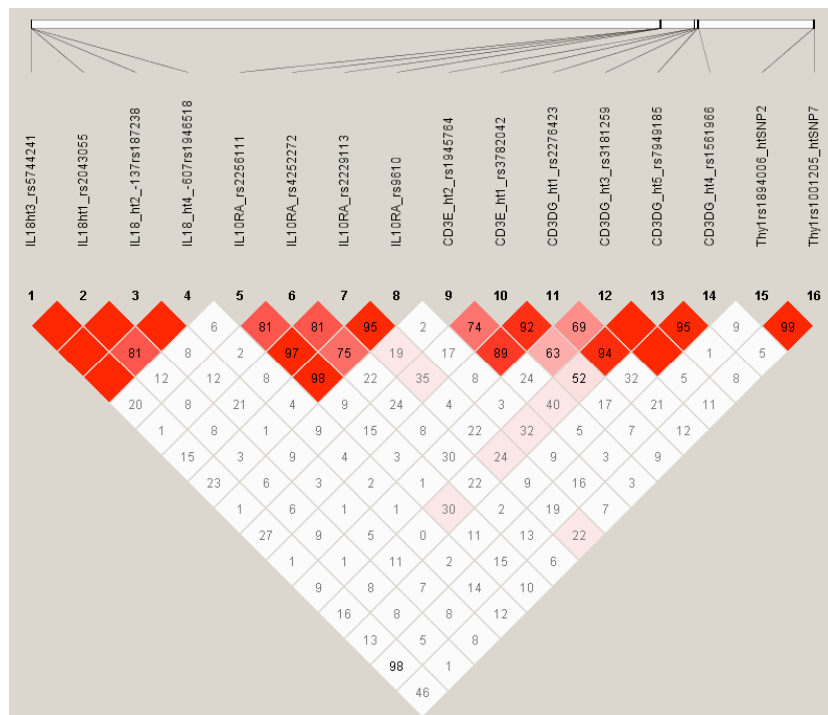

Supplementary Figure 1. Linkage Disequilibrium ( $D'$ ) in the 11q23 region in coeliac cases (a) and controls (b).
